# Supplementary material for: Golgi phosphoprotein 2 (GOLPH2) is a novel bile acid-responsive modulator of oesophageal cell migration and invasion
Source: PubMed Central journal article supplement — Br J Cancer. 2015 Oct 13;113(9):1332–42. doi: 10.1038/bjc.2015.350 (PMC4815786; doi:10.1038/bjc.2015.350), 2015-10-13
Supplement: bjc2015350x1.pdf [file bjc2015350x1.pdf]

**Squamous Epithelium /Non-dysplastic**

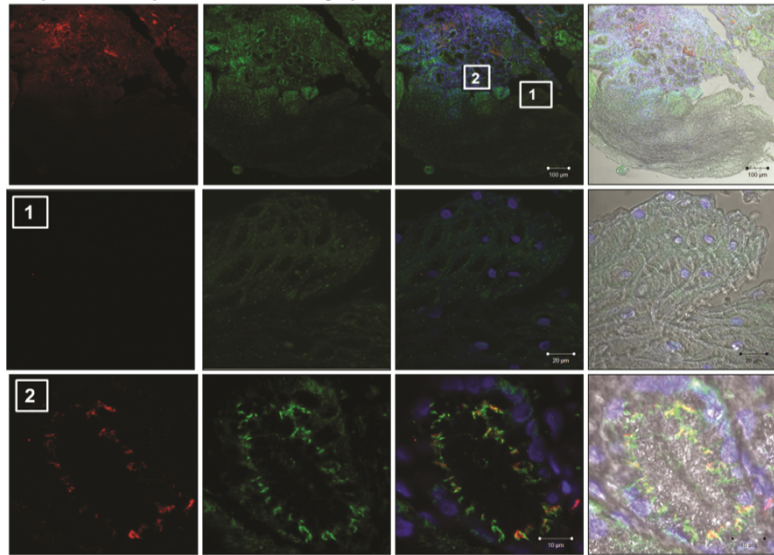

**Intestinal Metaplasia**

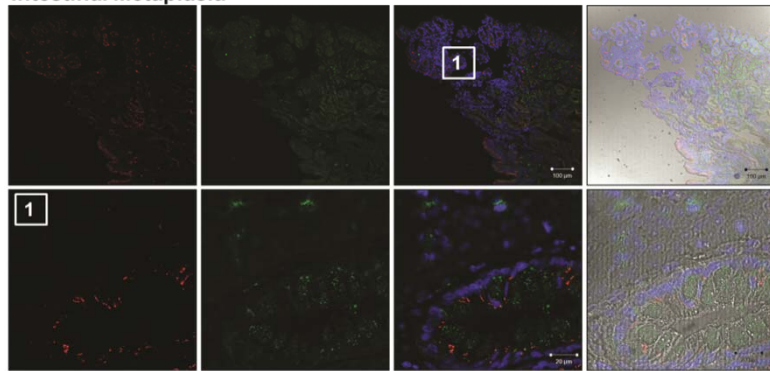

**Adenocarcinoma**

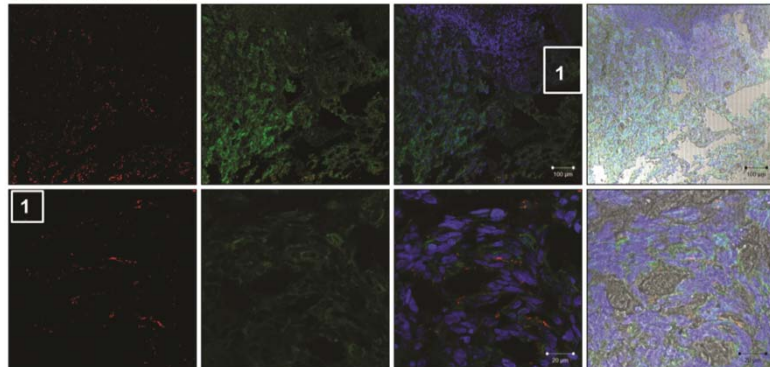

**Supplementary Figure 1**

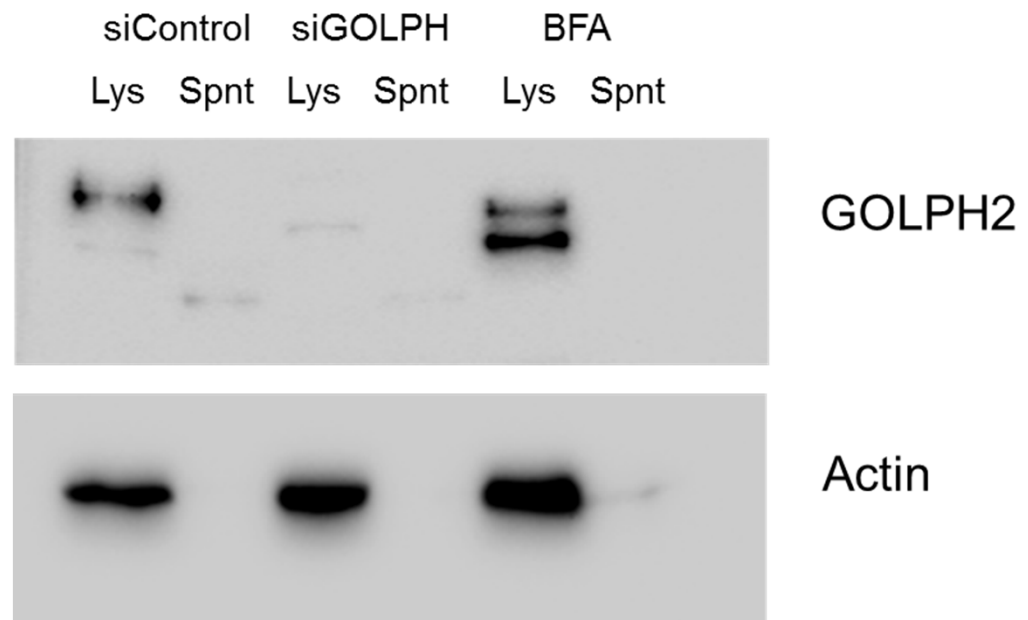

**Supplementary Figure 2**

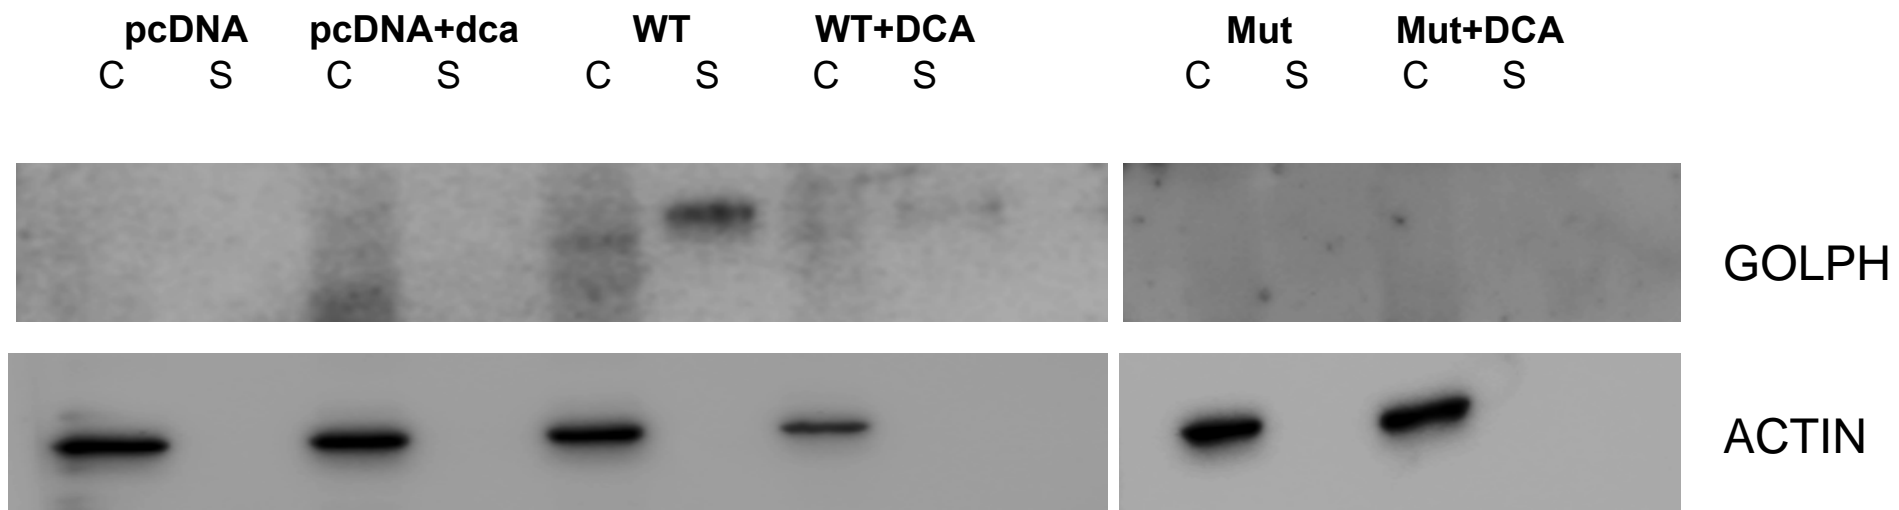

Supplementary Figure 3

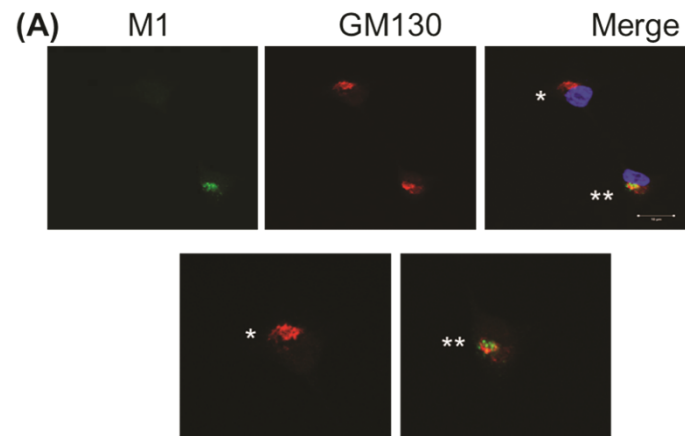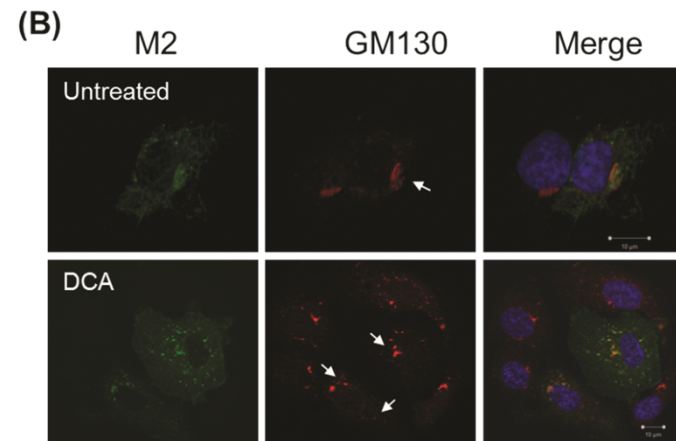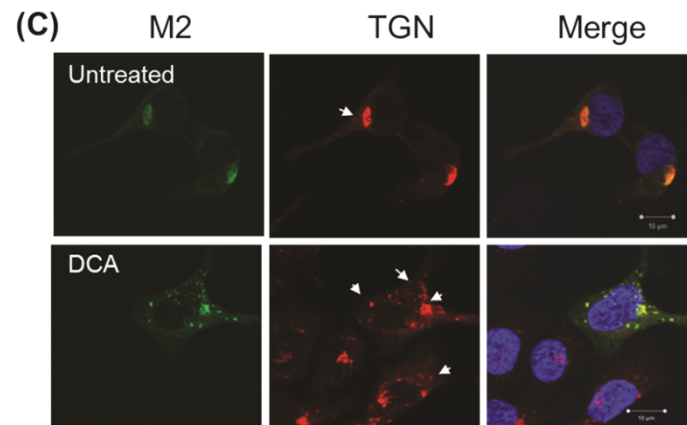

Supplementary Figure 4

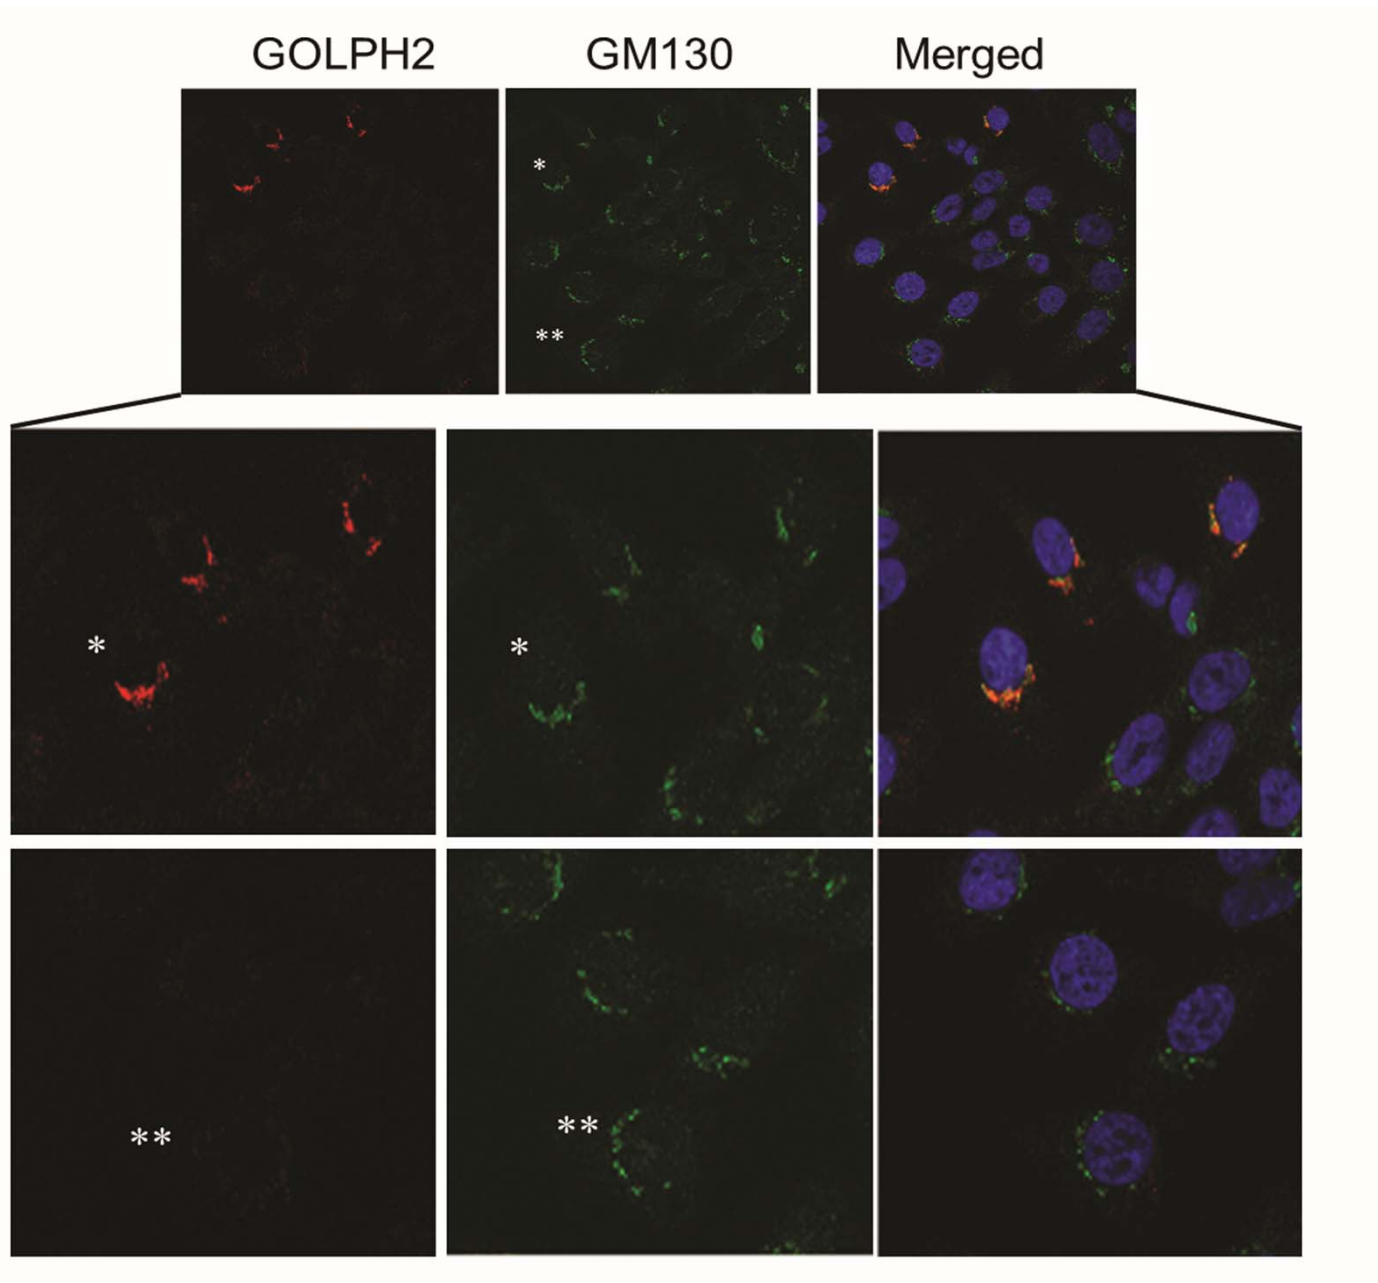

Supplementary Figure 5

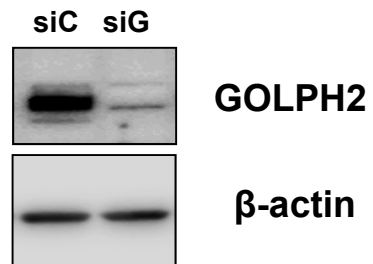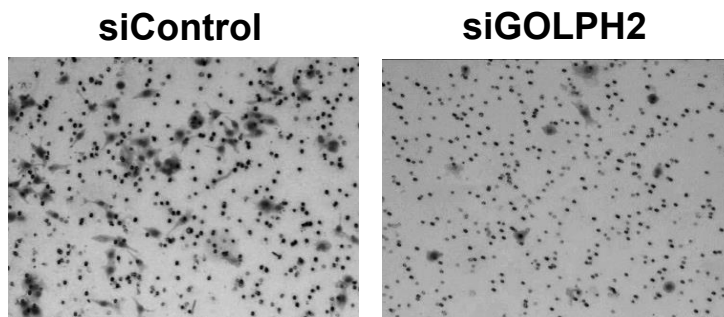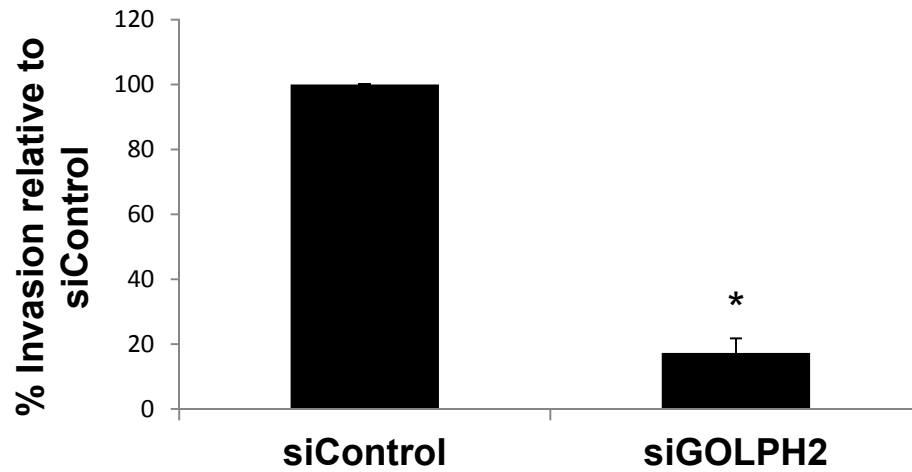

Supplementary Figure 6

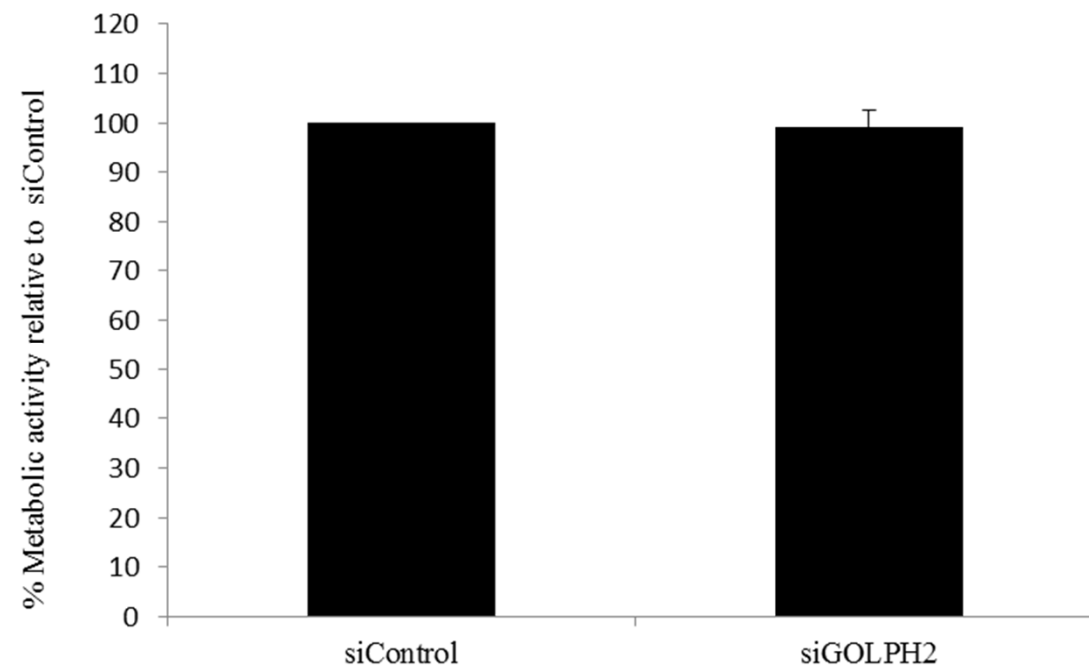

**Supplementary Figure 7**

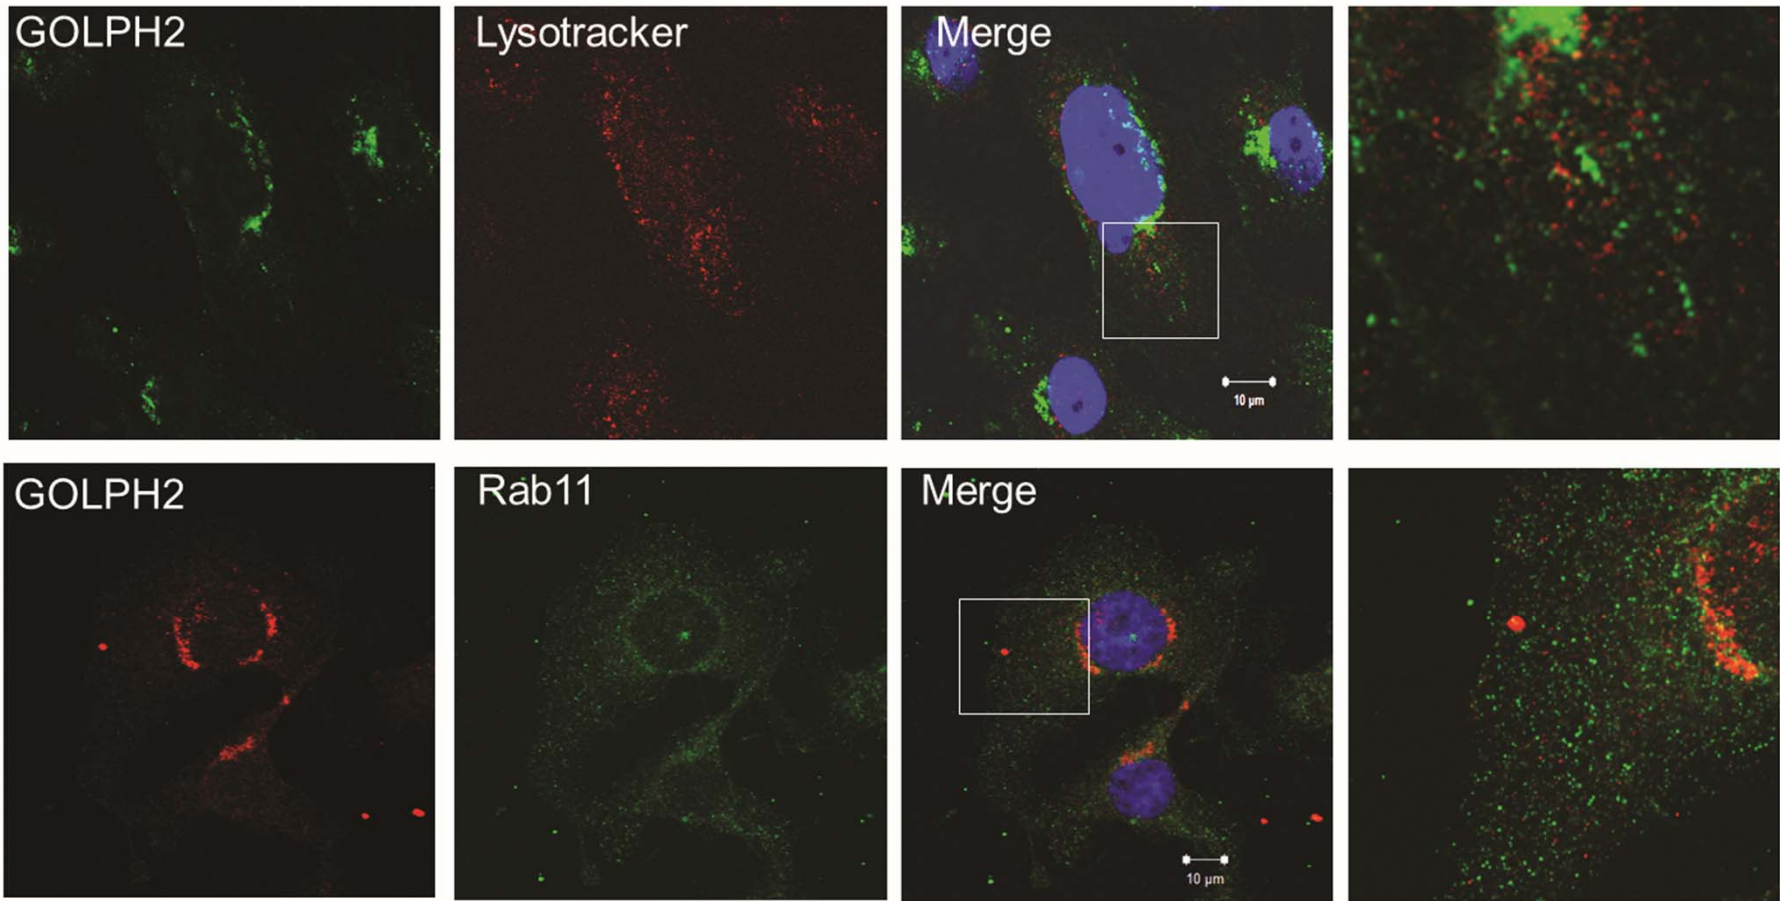

Supplementary Figure 8
